# Supplementary material for: Mitochondrial Adaptations to Oxidative Stress Confer Resistance to Apoptosis in Lymphoma Cells
Source: MDPI journal article supplement (doi:10.3390/ijms130810212), 2012-08-16

## Supplementary Material

**Figure S1.** Cytochrome *c* and AK-2 release is induced by tBid: vector control. Vector transfected control cells (NEO) were pre-treated with 1  $\mu$ M dexamethasone (A) or EtOH vehicle (B) for 12 h. Mitochondria were isolated, treated with various concentrations of recombinant tBid, and separated into mitochondrial (M) and supernatant (S) fractions. Representative immunoblots for cytochrome *c*, AK-2, and HSP60 are shown.

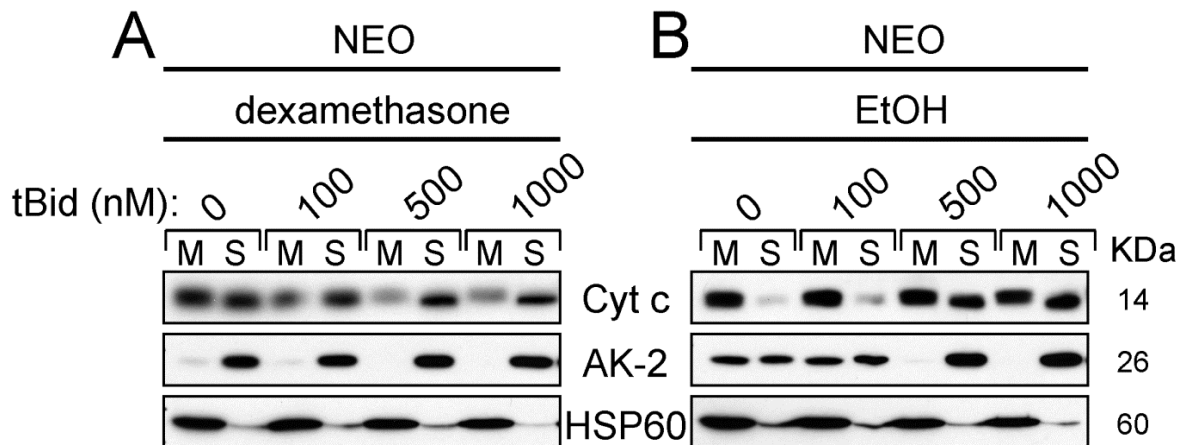

**Figure S2.** Cytochrome *c* and AK-2 release is induced by tBid: HSP60 control for integrity of the inner mitochondrial membrane. WEHI7.2 parental, 200R, CAT38, CAT2, and Hb12 cells were pre-treated with 1  $\mu$ M dexamethasone (A) or EtOH vehicle (B) for 12 h. Mitochondria were isolated, treated with various concentrations of recombinant tBid, and separated into mitochondrial (M) and supernatant (S) fractions.

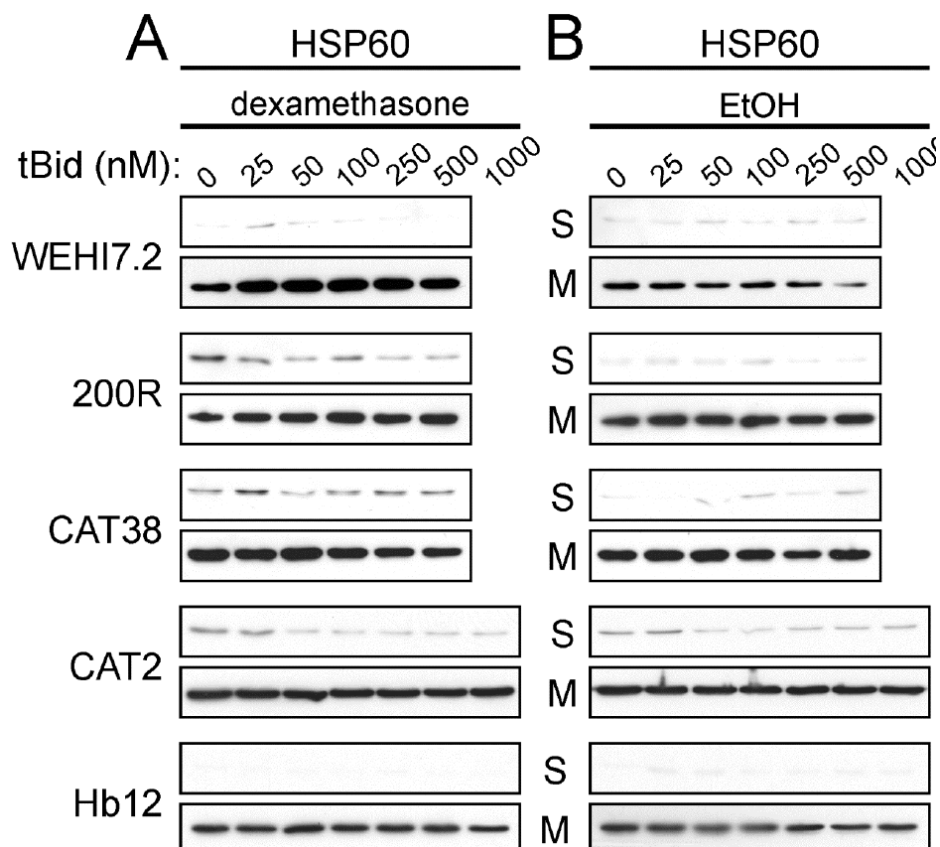

**Figure S3.** Smac/DIABLO release is induced by tBid. WEHI7.2 parental, 200R, CAT38, CAT2, and Hb12 cells were pre-treated with 1  $\mu$ M dexamethasone (A) or EtOH vehicle (B) for 12 h. Mitochondria were isolated, treated with various concentrations of recombinant tBid, and separated into mitochondrial (M) and supernatant (S) fractions.

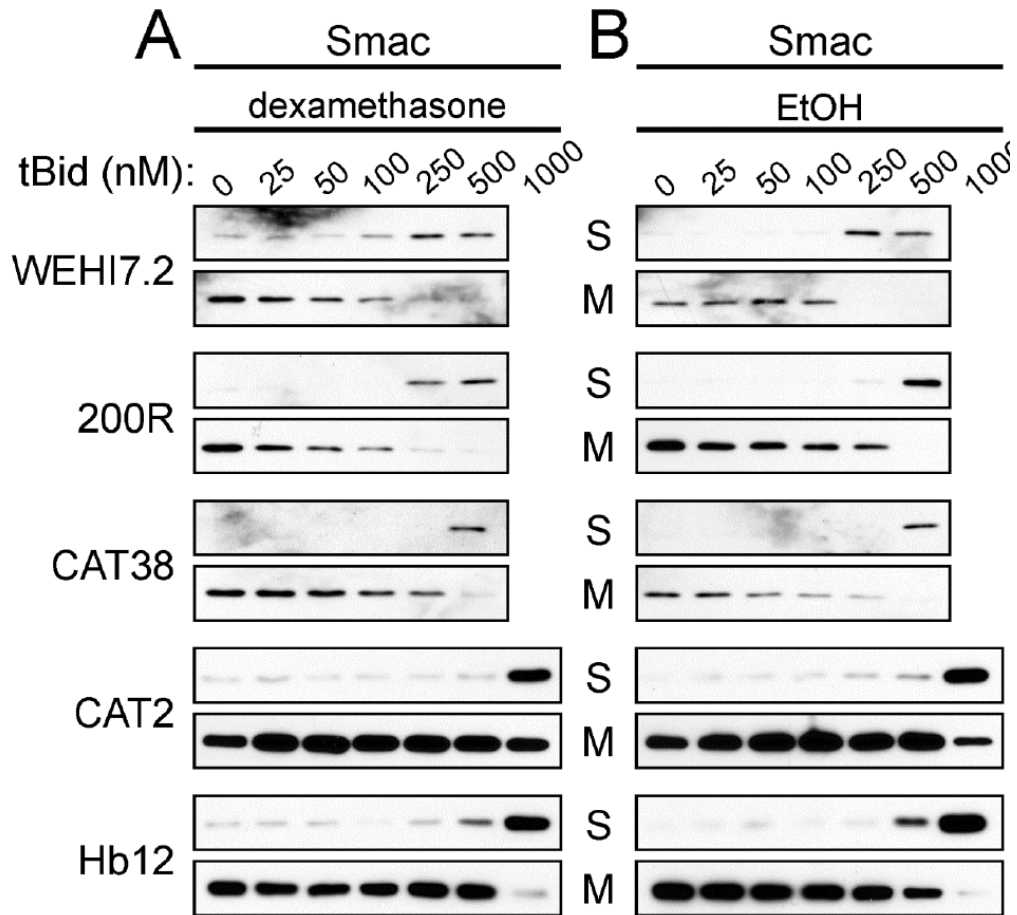

Supplement: s1 [file s1]
